1 **Agent-Based Modeling Demonstrates How Local Chemotactic Behavior**  
2 **Can Shape Biofilm Architecture**

3

4 Emily G. Sweeney<sup>a</sup>, Andrew Nishida<sup>b,1</sup>, Alexandra Weston<sup>a,2</sup>, Maria S.  
5 Bañuelos<sup>a</sup>, Kristin Potter<sup>c,3</sup>, John Conery<sup>b</sup>, Karen Guillemin<sup>a,d,\*</sup>

6

7 <sup>a</sup>Institute of Molecular Biology, University of Oregon, Eugene, Oregon 97403,  
8 United States

9 <sup>b</sup>Institute of Ecology and Evolution, University of Oregon, Eugene, Oregon  
10 97403, United States

11 <sup>c</sup>College of Arts and Sciences Information Technology, University of Oregon,  
12 Eugene, Oregon 97403, United States

13 <sup>d</sup>Humans and the Microbiome Program, Canadian Institute for Advanced  
14 Research, Toronto, Ontario M5G 1Z8, Canada

15

16 <sup>1</sup>Current address: Altius Institute, 2211 Elliott Ave., 4<sup>th</sup> floor, Seattle, Washington  
17 98121, United States

18 <sup>2</sup>Current address: Memorial Sloan Kettering Cancer Center, 885 2<sup>nd</sup> Ave, 6<sup>th</sup>  
19 floor, New York, New York 10017, United States

20 <sup>3</sup>Current address: National Renewable Energy Laboratory, 15257 Denver West  
21 Parkway, Golden, Colorado 80401, United States

22 \*Corresponding author: phone (541) 346-5360, email [kguillem@uoregon.edu](mailto:kguillem@uoregon.edu)

23

24 **Abstract:** Mature bacterial biofilms have elaborate three-dimensional  
25 architectures that endow these structures with their durability and resistance to  
26 environmental perturbations. We used agent-based modeling to explore whether  
27 local cellular interactions were sufficient to give rise to global structural features  
28 of biofilms. Specifically, we asked whether chemorepulsion from a self-produced  
29 quorum-sensing molecule, autoinducer-2 (AI-2), was sufficient to recapitulate  
30 biofilm growth and cellular organization observed for biofilms of the human  
31 pathogen *Helicobacter pylori*. To carry out this modeling, we modified an existing  
32 platform, Individual-based Dynamics of Microbial Communities Simulator  
33 (iDynoMiCS), to incorporate three-dimensional chemotaxis, planktonic cells that  
34 could join or leave the biofilm structure, and cellular production of AI-2. We  
35 simulated biofilm growth of previously characterized *H. pylori* strains with varying  
36 AI-2 production and sensing capacities. Using biologically plausible parameters,  
37 we were able to recapitulate both the variation in biofilm mass and cellular  
38 distributions observed with these strains. Specifically, the strains that were  
39 competent to chemotax away from AI-2 produced smaller and more  
40 heterogeneously spaced biofilms, whereas the AI-2 chemotaxis defective strains  
41 produced larger and more homogeneously spaced biofilms. The model also  
42 provided new insights into the cellular demographics contributing to the biofilm  
43 patterning of each strain. Our analysis supports the idea that cellular interactions  
44 at small spatial and temporal scales are sufficient to give rise to larger scale  
45 emergent properties of biofilms.

46 **Importance:** Most bacteria exist in aggregated, three-dimensional structures  
47 called biofilms. Biofilms are resistant to antimicrobials and can pose societal  
48 problems, for example when they grow in plumbing systems or on medical  
49 implants. Understanding the processes that promote the growth and disassembly  
50 of biofilms could lead to better strategies to manage these structures. We had  
51 previously shown that *Helicobacter pylori* bacteria are repulsed by high  
52 concentrations of a self-produced molecule, autoinducer-2 (AI-2) and that *H.*  
53 *pylori* mutants deficient in AI-2 sensing form larger and more homogeneously  
54 spaced biofilms. Here we used computer simulations of biofilm formation to show  
55 that local *H. pylori* behavior of repulsion from high AI-2 could explain the overall  
56 architecture of *H. pylori* biofilms. Our findings demonstrate that it is possible to  
57 change global biofilm organization by manipulating local cell behaviors, which  
58 suggests that simple strategies targeting cells at local scales could be useful for  
59 controlling biofilms in industrial and medical settings.

60

61 **Keywords** (4-6)

62 Biofilms, agent-based modeling, *Helicobacter pylori*, autoinducer-2, chemotaxis

63

64 **Introduction**

65 Bacteria often exist in aggregated, adherent communities called biofilms in  
66 which the cells are encased in a self-produced matrix and adopt distinctive three-  
67 dimensional architectures with heterogeneous cell spacing that gives rise to  
68 networks of channels. These biofilm structures confer increased resistance to

69 environmental stressors such as antibiotics, changes in pH, and host immune  
70 defenses (1, 2). The architecture of mature biofilms contributes to their durability  
71 and resilience to perturbations by allowing for the flow of nutrients and waste  
72 products into and out of the cell aggregates (2–5). Biofilms create many  
73 commercial and biomedical problems for society, from biofouling of municipal  
74 waterworks to life-threatening infections by pathogens harbored on medical  
75 implants or the lungs of cystic fibrosis patients (1, 6, 7). Being able to understand  
76 and ultimately manipulate biofilm assembly and disassembly would help address  
77 several major industrial and biomedical challenges.

78 Biofilm assembly has been described alternatively as a developmental  
79 program controlled by stage-specific gene expression, similar to the development  
80 of a multicellular organism, or as the outcome of local adaptations of individual  
81 cells (8, 9). Distinguishing these two alternative possibilities is challenging  
82 because it can be difficult to discern whether biofilm phenotypes are achieved by  
83 optimizing group or individual fitness. For example, genes identified through  
84 forward genetic screens as being required for normal biofilm structures could be  
85 interpreted alternatively as being part of a biofilm genetic program or as  
86 controlling certain cellular behaviors that contribute to the self-assembly of biofilm  
87 structures. As a complement to experimental studies, computational modeling  
88 has played an important role in the study of biofilm assembly because it provides  
89 researchers with the opportunity to test and refine their understanding of the  
90 minimal set of parameters that can give rise to biofilm structures observed in  
91 nature (10–12).

92           A distinguishing feature of the biofilm lifestyle is that cells in close  
93 proximity can produce and respond to secreted molecular signals on small  
94 spatial and temporal scales. One such example of a secreted signal is the class  
95 of quorum-sensing molecules that serve as density-dependent forms of  
96 communication to influence group behaviors. These can include species-specific  
97 molecules, such as acylated homoserine lactones produced by many Gram-  
98 negative bacteria and perceived by species-specific receptors. Another example  
99 of a quorum-sensing molecule is the tetrahydroxy furan molecule autoinducer 2  
100 (AI-2), which is produced by many bacteria through a common metabolic  
101 pathway but elicits different responses through species-specific receptors.  
102 Quorum-sensing molecules often regulate gene expression, including genes  
103 involved in biofilm growth and dissolution, by acting through canonical signal  
104 transduction pathways (13, 14). In this context, quorum-sensing molecules can  
105 be viewed as master regulators of biofilm developmental programs. AI-2  
106 specifically has been shown to influence the overall structure of bacterial biofilms  
107 in diverse organisms such as *Bacillus*, *Streptococcus*, *Aggregatibacter*,  
108 *Pseudomonas*, *Escherichia*, *Vibrio*, and *Helicobacter* (15–22). In addition to  
109 regulating gene expression, AI-2 can elicit more immediate behaviors in bacteria  
110 through chemotaxis signal transduction that directs bacterial movement relative  
111 to a chemical gradient (16, 23–27). In the case of *Helicobacter pylori*, we showed  
112 that AI-2 is perceived as a chemorepellent (28), whereas *Escherichia coli*  
113 perceives AI-2 as a chemoattractant (25).

114 Previous experimental work from our group showed that both *H. pylori*  
115 biofilm mass and structural patterning are influenced by AI-2 chemotaxis. To  
116 determine the role of AI-2 in *H. pylori* biofilm formation, we constructed strains  
117 that were defective for AI-2 production (*luxS*<sup>-</sup>), AI-2 chemoreception (*cheA*<sup>-</sup>, *tlpB*<sup>-</sup>,  
118 *aibA*<sup>-</sup>, *aibB*<sup>-</sup>), or overproduced AI-2 (*luxS*<sup>OP</sup>). We measured the biomass of the  
119 resulting biofilms using a crystal violet assay. We also measured the structural  
120 heterogeneity of the resulting biofilms by imaging them with fluorescence  
121 microscopy and quantifying a lacunarity metric that captures morphological  
122 features such as roughness of biofilm edges and patchiness of surface coverage.  
123 We observed that both AI-2 sensing and production mutants formed larger  
124 biofilms with more homogenous organization, whereas the strain that  
125 overproduced AI-2 formed smaller, more heterogeneously structured biofilms  
126 (16).

127 Our experimental observations are consistent with a role for AI-2  
128 chemorepulsion in shaping biofilm structure. For example, bacterial cells that  
129 chemotax away from AI-2 would be motivated to leave and deterred from joining  
130 a biofilm that is a concentrated source of AI-2. Our experimental results,  
131 however, could not rule out the possibility that additional functions of AI-2  
132 signaling, such as regulation of global gene expression programs, contribute to  
133 the overall architecture of *H. pylori* biofilms. Here we used agent-based modeling  
134 to ask whether individual cellular behaviors of AI-2 production and chemotaxis  
135 are sufficient to produce global features of biofilm structures observed  
136 experimentally.

137           To explore the extent to which AI-2 chemotactic responses could explain  
138 our experimental observations, we used a well-established biofilm modeling  
139 platform, Individual-based Dynamics of Microbial Communities Simulator  
140 (iDynoMiCS) (29), which simulates behaviors of individual bacterial cells to  
141 understand larger, community behaviors. We implemented several critical  
142 modifications to iDynoMiCS in order to explore whether AI-2 chemotactic  
143 responses could recapitulate our experimentally observed biofilms. First, we  
144 expanded the models to include three spatial dimensions. Next, we included a  
145 population of planktonic (free swimming) cells that were continually introduced  
146 into the bulk medium and could join the biofilm. Additionally, cells from the biofilm  
147 could leave and become part of the planktonic population. Finally, we introduced  
148 AI-2 as a compound that was produced by individual cells as a function of their  
149 metabolic capacity and that diffused through the three dimensional space.

150           With the addition of AI-2 production and chemoreception to our modeling  
151 platform, we recapitulated our previous experimental data showing that biofilms  
152 of strains lacking the ability to produce or sense AI-2 were larger than wild type  
153 biofilms. In addition, the architecture of the biofilms, including spacing of cell  
154 groups within the biofilms, matched well between the experimental and modeled  
155 biofilms. Finally, our modeling of biofilms contributed new insight into the  
156 demographics dictating biofilm size, suggesting that cell dispersal is a major  
157 contributor to the reduced biofilm mass of AI-2-responsive versus non-responsive  
158 cells. These results indicate the utility of our modified iDynoMiCS platform for  
159 studying chemotaxis in biofilm dynamics and provide support for the view that

160 local cellular behaviors of AI-2 chemotaxis can explain global features of biofilm  
161 formation and patterning.

162

## 163 **Materials and Methods**

### 164 Computational modeling of biofilms

165 The simulation of the growth of biofilms was accomplished using the  
166 agent-based modeling package iDynoMiCs. Individual cells are represented as  
167 discrete spherical agents with programmable behaviors that are subject to  
168 influence from other agents and their surrounding environments. The model  
169 consists of an evenly spaced grid of three dimensions with two compartments –  
170 the bulk and the bacterial. The bulk compartment at the top represents well-  
171 mixed bulk solutes that interface with the bacterial compartment at the bottom  
172 through a diffusion liquid boundary layer. Solutes are represented by  
173 concentration fields changing due to diffusion and from uptake by the cells in the  
174 bacterial compartment that provides a surface for initial seed cells to attach. As  
175 the cells uptake solutes, they can grow and divide or die above or below certain  
176 set size thresholds. These processes of growth and division lead to mechanical  
177 stress between the cells, which is relieved through a shoving algorithm. This  
178 shoving and the simulation of other physical forces on the biofilm dictate the  
179 formation of the biofilm's structure.

180 To represent a bacterial population with both biofilm-attached cells and  
181 planktonic cells and to simulate the dynamics of cells joining and leaving a  
182 biofilm, we extended iDynoMiCs to include new agents with attributes and



183 behaviors specific to planktonic cells. This version is available at  
184 <https://github.com/alexwweston/iDynoMiCS>. Cells can be either biofilm-  
185 associated or planktonic cells capable of movement in two or three dimensions.  
186 A set number of planktonic cells are introduced into the simulation from the bulk  
187 compartment at a chosen interval and removed from the simulation if they leave  
188 the boundaries of the bacterial compartment. An individual planktonic cell will  
189 move at a random distance between 0 and its maximum distance at a random  
190 angle. If it ends its movement within a certain distance from a biofilm-associated  
191 cell, it will then switch from planktonic to biofilm-associated behaviors. The  
192 maximum distance to move and the threshold distance for joining a biofilm are  
193 simulation parameters.

194 Planktonic cells are also given behaviors to simulate chemotaxis  
195 response. A chemotaxing planktonic cell has attributes from the solute it  
196 identifies as a chemoeffector, whether or not it exhibits an attractive or repellent  
197 response to this chemoeffector, and the threshold for recognizing this  
198 chemoeffector. Before moving, a planktonic cell will detect the concentration of  
199 its chemoeffector at its current location. If it is above its chemoeffector threshold,  
200 it will detect the gradient of the chemoeffector and move at an angle towards or  
201 away from this gradient depending on its response.

202 The attributes and behaviors of biofilm-associated cells are additionally  
203 extended to simulate biofilm-associated cells leaving the biofilm and becoming  
204 planktonic. A biofilm-associated cell has attributes for its chemoeffector, a  
205 threshold for recognizing this chemoeffector, and a probability for leaving the

206 biofilm if this threshold is surpassed. At the end of each interval in the simulation,  
207 cells on the periphery of the biofilm will check the local concentrations of their  
208 chemoeffector. If the concentration is above its chemoeffector threshold, that cell  
209 has a chance of leaving the biofilm at a frequency equal to its leaving probability.  
210 Upon leaving the biofilm, that cell becomes a planktonic cell and moves from the  
211 biofilm at a random angle away from the chemoeffector gradient. The chosen  
212 chemotaxis threshold corresponds to the concentration of AI-2 at which  
213 planktonic cells contribute to the population of the biofilm at the midpoint between  
214 cells never joining the biofilm and cells always joining the biofilm (Supplemental  
215 Figure 1).

216 To model the production of AI-2 by the cells, we examined multiple AI-2  
217 production regimes, each creating different concentrations and localization  
218 patterns of AI-2 in the model biofilms. These three regimes included: constitutive  
219 production of AI-2, production of AI-2 tied to the growth reaction, and production  
220 of AI-2 tied to the growth reaction with additional uptake of AI-2 by the cells.  
221 Although the distribution of the AI-2 molecule within a biofilm is unknown, we  
222 measured the total concentration of AI-2 at different time points in *H. pylori*  
223 biofilms and compared these results with the total concentrations of AI-2  
224 generated in our simulations under the different regimes (data not shown). From  
225 these results, we chose to model AI-2 production where it was tied to the growth  
226 reaction with uptake by the cells.

227

228

## 229 Setting up and running simulations

230 We simulated the movement of bacteria through a 280x280x280  $\mu\text{m}$   
231 space for a period of 24 h. The space was modeled as a 33x33x33 grid. Fluid  
232 movement was simulated using a major time step size of 1.0 h, and bacterial  
233 behaviors (movement, joining, leaving) were updated at minor time steps of 0.05  
234 h. Each simulation was seeded with 100 bacteria cells randomly placed on the  
235 bottom layer of the simulated grid. Outputs for visualization were recorded at the  
236 end of every major time step. Other parameters for concentration and diffusivity  
237 of solutes and the cell attributes of agents were taken from measurements of *E.*  
238 *coli* biofilms used in other simulations under iDynoMiCs. Erosion and sloughing  
239 processes that can be modeled in iDynoMiCs were turned off for these  
240 simulations. A full list of these parameters that were static in our simulations is  
241 available in Supplementary Table 1.

242 Parameters that were introduced in this new model were tested across a  
243 wide variety of ranges and values were chosen where moderate behavior was  
244 observed. Microbial growth kinetics were modeled using the Monod growth  
245 equation with an additional term representing the production of AI-2. The values  
246 for these parameters and equations for the wild type strain used in the  
247 simulations are found on Supplementary Table 2. Mutant strains used in the  
248 simulations use minor modifications of these values, which are highlighted on  
249 Supplementary Table 3. The mutant chemotaxis strain is given an infinite value  
250 for its chemotaxis threshold causing it to never detect its chemoeffector, the  
251 mutant overproducer strain is given a larger AI-2 yield coefficient, and the mutant

252 strain defective in AI-2 production creates an arbitrary alternative product other  
253 than AI-2 from its growth reaction.

254

### 255 Visualizing the biofilms

256 The visualization of the agent-based simulation of gut microbes was  
257 created using custom-built codes developed in C++, using OpenGL for the  
258 graphics and Qt for the user interface. The simulations are run within iDynoMiCS,  
259 which exports the entirety of the simulation in XML. Each microbe is displayed as  
260 a sphere that has a radius dictated by the simulation and a color based on the  
261 microbe type, and in some scenarios, modified based on family, genealogy,  
262 generation, or birthday. Each founding cell is labeled in a different shade of pink  
263 and the daughter cells remain the same color as the original founding cell to  
264 allow for recognition of clones. The code is open source and can be downloaded  
265 at <https://bitbucket.org/kpotter/vizr>.

266 The visualization of the AI-2 gradients via contours was done using the R  
267 library filled.contours. To create these images, the data is loaded into R, a single  
268 slice of the data volume is extracted at a specified timepoint, and this data is  
269 used as input to the contours function. The R code is provided in Supplemental  
270 Materials and Methods.

271

### 272 Calculating lacunarity

273 The simulated biofilms all become 100% confluent by 24 h. To compare  
274 more directly to the experimental biofilms, which were often not confluent by 24

275 h, a bottom portion of each simulated biofilm was removed. To decide how much  
276 to trim off, the percent cell coverage across all experimental wild type images  
277 was determined to be approximately 43% percent coverage using ImageJ.  
278 Removing the bottom 98  $\mu\text{m}$  from the simulated biofilms resulted in 43%  
279 coverage for a representative set of wild type biofilms, viewed from the top down  
280 (Figure 4A). Therefore, 98  $\mu\text{m}$  was removed from all simulated biofilms and  
281 lacunarity was determined. To determine the lacunarity score, we opened the  
282 experimental or trimmed simulated biofilm images in ImageJ, converted them to  
283 black and white, adjusted the threshold to a set cutoff, and analyzed the resultant  
284 images using the FraCLac plugin.

285

## 286 **Results**

287

### 288 ***Addition of chemotaxis and AI-2 production to agent-based modeling of*** 289 ***biofilm formation***

290 Agent-based models are useful tools for exploring how simple interactions  
291 between cells contribute to the overall properties of bacterial communities, such  
292 as biofilms. iDynoMiCS simulates biofilm formation by taking into account  
293 biologically relevant parameters such as nutrient concentrations, nutrient  
294 diffusion rates, and cell division and spacing [see Supplementary table 1 for  
295 parameters used in the simulation (29)]. To investigate the role of AI-2 mediated  
296 chemotaxis in biofilm architecture, we extended the iDynoMiCS model by  
297 introducing several properties, including: three-dimensional chemotaxis,

298 planktonic (free swimming) cells, cells joining and leaving the biofilm, and AI-2  
299 production. These new iDynoMiCS additions were critical for exploring how  
300 chemoreception of AI-2 shapes *H. pylori* biofilms. In addition, these  
301 developments necessitated a new visualization tool that aided in data  
302 interpretation (see Materials and Methods).

303         Our extended model starts with 100 bacterial cells randomly placed on the  
304 two-dimensional surface at the bottom of a container that is continually supplied  
305 with fresh, nutrient-containing medium. These cells expand and proliferate  
306 according to the iDynoMiCS growth and spacing algorithms. We allowed new  
307 planktonic cells to enter the container throughout each 24 h simulation (Figure 1A  
308 and Supplementary movies). The planktonic cells moved through the space  
309 according to a chemotaxis algorithm (see Materials and Methods). Planktonic  
310 cells would join the simulated biofilm if they swam close enough to the biofilm  
311 surface and if the concentration of a chemorepellant was below a set threshold.  
312 In addition, cells at the biofilm edge could leave and enter into the planktonic  
313 pool. In our simulations, we chose the AI-2 chemotaxis threshold to be that at  
314 which planktonic cells contributed to the population of the biofilm to the extent  
315 that was defined as halfway between cells never joining the biofilm and cells  
316 always joining the biofilm (Supplemental Figure 1).

317         After testing several models of AI-2 production (see Materials and  
318 Methods), we chose a model that tied AI-2 production directly to the growth and  
319 metabolism of each cell or agent. This model is reasonable because AI-2 is  
320 produced as a by-product of the activated methyl cycle (30). We also

321 incorporated into the model a constant cellular uptake of AI-2, which is common  
322 in bacteria (31). We do not yet know whether *H. pylori* has an active AI-2 uptake  
323 mechanism, but incorporating a constant uptake parameter best recapitulated  
324 our experimental measurements of AI-2 [(16, 23) and data not shown]. In the  
325 iDynamics simulations, cells near the surface of the modeled biofilms have more  
326 access to fresh nutrients and therefore divide and produce AI-2 at a higher rate  
327 than cells in the middle or bottom of the biofilm (Figure 1B). The constant cellular  
328 uptake of AI-2 in the model resulted in a lower concentration of AI-2 in the  
329 volume just below the surface of the biofilm (Figure 1B).

330

### 331 ***Modeling recapitulates biofilm mass as a function of AI-2 chemorepulsion***

332 Using the model, we tested whether we could recapitulate the outcomes of  
333 our previous experiments demonstrating an important role for AI-2 production  
334 and chemorepulsion in *H. pylori* biofilm mass and patterning (16). To simulate  
335 these experiments, we modeled the strains and conditions used in this  
336 experimental work. The strains included wild type cells, cells unable to chemotax,  
337 cells unable to produce AI-2, and cells that overproduce AI-2. For each of these  
338 genotypes we ran 30 individual iterations and compared the number of cells in  
339 our simulated *H. pylori* biofilms to those of experimental work (Figure 2). Wild  
340 type cells produced moderately sized biofilms in both the model and the  
341 experimental set-up, while cells that could not produce AI-2 or chemotax away  
342 from AI-2 produced larger biofilms. Finally, both experimental and modeling  
343 results revealed that the AI-2 overproducer made smaller biofilms. This data

344 served as confirmation that our modeling platform could recapitulate  
345 experimental results.

346

### 347 ***Modeling predicts subcellular populations that contribute to biofilm mass***

348 The model afforded us the opportunity to examine the cellular  
349 demographics contributing to biofilm mass, which would be difficult to do  
350 experimentally. We modeled biofilm formation for 24 h in 30 parallel simulations  
351 and tallied the individual leaving events and joining events. Wild type biofilms  
352 showed equivalent numbers of joining and leaving cells (Figure 3). As expected,  
353 biofilms of non-chemotactic and AI-2 non-producing cells had no leaving events,  
354 since AI-2 chemorepulsion was the only leaving mechanism in the model. The  
355 AI-2 over-producer strain had a dramatic increase of leaving events, which was  
356 expected given the higher concentration of AI-2 near the surface of the biofilm  
357 (Figure 2B) that would drive cells to chemotax away from the biofilm.

358 Interestingly, both the non-chemotactic and AI-2 non-producers had a reduction  
359 in the number of joining events as compared to the wild type population, despite  
360 not experiencing chemorepulsion from the biofilm. Also counter-intuitively there  
361 were more overall joining events in the AI-2 over-producer strain biofilm than in  
362 the wild type population. As discussed below, the number of joiners could be  
363 explained by the differences in architectures and specifically surface areas and  
364 joining opportunities afforded by the growing biofilms of the different strains.

365 Overall, our modeling supports the idea that AI-2 chemorepulsion promotes a  
366 balance of leaving and joining events that influences the global biofilm size.



367

368 ***Modeling recapitulates the impact of AI-2 chemorepulsion on biofilm***  
369 ***spatial organization***

370 Finally, we used modeling to confirm that AI-2 shapes *H. pylori* biofilm  
371 architecture. We had shown previously that we could quantify the heterogeneity  
372 of biofilms using a lacunarity metric, which measures spacing between patterns  
373 and boundary smoothness. Experimental biofilms were grown on glass slides,  
374 fixed and stained with DAPI and visualized with epifluorescence. The cellular  
375 component of the biofilm was defined using an intensity threshold and the  
376 resulting images were analyzed using an ImageJ plugin, FracLac, to quantify  
377 lacunarity [Figure 4, (32–34)]. We took 10 simulated biofilms for each genotype  
378 and performed a similar analysis of a top view of the structure (Figure 4A).  
379 Visually, the simulated biofilm structures (Figure 4B) resembled the experimental  
380 data (Figure 4C). The wild type and AI-2 overexpressing strains produced  
381 biofilms with marked spacing between cell patches, whereas the non-  
382 chemotactic and AI-2 non-producing strains formed much more homogeneous  
383 structures. Plotting the resulting lacunarity scores revealed a striking similarity  
384 between experimental and modeling data (Figure 4D and E).

385

386 **Discussion**

387 In this study, we used agent-based modeling to explore whether local cell  
388 chemotactic responses to a self-produced molecule could explain biofilm growth  
389 and patterning properties. By extending the iDynoMiCS modeling platform to

390 include three-dimensional chemotaxis, cell joining and leaving events, and AI-2  
391 production, we were able to recapitulate our experimental observations of *H.*  
392 *pylori* biofilm formation with a collection of strains with different AI-2 production  
393 and perception properties (16). We showed that cells unable to make or  
394 chemotax away from AI-2 produced larger biofilms than wild type cells. These  
395 biofilms also differed in their organization with more homogenous cell spacing  
396 and smaller gaps between cell clusters. Over-production of AI-2 resulted in  
397 smaller and more heterogeneously spaced biofilms. Mature biofilms are complex  
398 structures with towers and channels that facilitate fluid flow for efficient oxygen  
399 and nutrient permeation, waste excretion, and cell turnover (2–5). We found that  
400 by modeling local chemotactic responses to a self-produced molecule, we could  
401 simulate the assembly of biofilms with the global property of high lacunarity,  
402 characteristic of biofilms with extensive channels (Figure 4). The agreement  
403 between our simulations and experimental results supports the idea that local  
404 cellular behaviors, such as production and chemoavoidance of AI-2, can explain  
405 global architectural features of bacterial biofilms.

406         Our modeling approach allowed us to dissect the demographics of biofilm  
407 assembly in a way that would be difficult to do experimentally without  
408 sophisticated genetic tools for marking cell lineages. As expected, in our model  
409 cells left the biofilm when they were programmed to chemotax away from AI-2,  
410 and they left in greater numbers when the biofilm cells produced more AI-2. We  
411 did not initially expect the wild type and AI-2 overproducer populations to have  
412 more cells join the biofilms than the populations without chemotaxis or AI-2

413 production. However, inspection of the biofilm structures assembled in these  
414 different models showed that the wild type and overproducer biofilms had many  
415 more gaps and edges, creating more extensive surface area that planktonic cells  
416 would stochastically encounter and then join at a certain probability. This  
417 difference in surface area and joining opportunities could explain the higher  
418 numbers of joiners in the populations of cells engaging in AI-2 chemorepulsion.  
419 In addition, the heterogeneous architectures of these biofilms would create local  
420 minima in AI-2 concentrations and opportunities for joining even in the context of  
421 AI-2 chemorepulsion. Differences in the local AI-2 concentration landscapes  
422 could explain the higher number of joiners seen with the AI-2 overproducer  
423 versus wild type cell populations.

424         Although our model recapitulated several features of AI-2 dependent  
425 biofilm assembly observed experimentally, it is based on certain assumptions  
426 about AI-2 fluxes that are likely to be oversimplifications. In our current model, AI-  
427 2 production is linked to metabolic activity and uptake is constant. When  
428 examined experimentally, parameters of AI-2 production, uptake and sensing are  
429 known to vary greatly between bacterial species and depending on cells'  
430 metabolic states (35–38). Using deterministic simulations of AI-2 production from  
431 a system of ordinary differential equations, Quan and colleagues showed that  
432 variability in AI-2 uptake within a modeled biofilm can lead to desynchronization  
433 of autoinduction across the community (39), highlighting the importance of  
434 considering heterogeneities in AI-2 fluxes. In addition, AI-2 could be produced  
435 from sources other than the bacterial constituents of a biofilm. For example,

436 mammalian host tissues were recently shown to synthesize an AI-2 mimic that is  
437 sensed by bacterial AI-2 receptors (40). Future iterations of the model could  
438 incorporate more detailed parameters of AI-2 fluxes, but these would need to be  
439 tailored to the specific bacterial species and environments being modeled.

440 Most bacteria exist not in mono-cultures but rather in multi-species  
441 consortia (41). AI-2 is known to contribute to the organization of such consortia,  
442 for example in biofilms that assemble on the enamel surfaces of teeth (42, 43).  
443 Recently, Laganenka and Sourjik showed that in a simple two-member biofilm  
444 community of *Enterococcus faecalis* and *Escherichia coli* cells, AI-2 chemotaxis  
445 plays an important role in biofilm growth and patterning. In this model community,  
446 both species produce AI-2 but only *E. coli* chemotaxes toward it (27). It would be  
447 interesting to apply our modeling approach to this experimental system to test  
448 whether it would recapitulate observed architectural features, such as the spatial  
449 segregation of *E. faecalis* and *E. coli* cells. More generally, by applying our  
450 modeling approach to complex multi-species communities and assigning simple  
451 AI-2 production, chemoattraction, and chemorepulsion behaviors to different  
452 members, one could explore the extent to which local AI-2 chemotactic  
453 responses could explain global spatial patterning observed in multi-species  
454 communities.

455

## 456 **Acknowledgements**

457 Research reported in this publication was supported by the National Institute of  
458 Diabetes and Digestive and Kidney Diseases and the National Institute of

459 General Medical Sciences of the National Institutes of Health under award  
460 numbers R01DK101314 and P50GM098911 (to K.G.) and the Medical Research  
461 Foundation Oregon Scientist Development Award (to E.G.S). The content is  
462 solely the responsibility of the authors and does not necessarily represent the  
463 official views of the National Institutes of Health.

464

#### 465 **Figure Legends**

466 **Figure 1. Time steps and AI-2 gradients of example wild type iDynoMiCS**  
467 **modeled *H. pylori* biofilm.** A) Wild type biofilm after 2, 16 and 24 h of growth.  
468 Each sphere represents a modeled bacterial cell with colors corresponding to  
469 different cell behaviors (see legend). Note there is a mix of cells leaving, dividing  
470 from the original founding population and cells joining the biofilm. Each grouping  
471 of pink cells represents a clonal population. B) Shown are corresponding AI-2  
472 concentration graphics below each time point shown in A. The AI-2 concentration  
473 is a representative vertical slice through the center of the 3D modeled biofilm,  
474 with darker color representing higher concentrations of AI-2.

475

476 **Figure 2. Modeling confirms AI-2 chemotaxis and production alter overall**  
477 **biofilm size.** A) Representative images of 24 h biofilms for each of the four  
478 strains in grayscale to show contours. To simplify, only the founding population,  
479 their progeny and joiners are shown. Planktonic cells have been removed for  
480 simplicity. B) The associated AI-2 gradients for panels in A. C) Total number of  
481 cells attached to the modeled biofilms at timepoint 24 h. n = 30 D) The size of the

482 experimental biofilms from Anderson et al. are graphed according to percentage  
483 of cells in the biofilm (compared to planktonic). Stars indicate a significant  
484 difference from wild type. Statistics for C and D were determined using a one-  
485 way analysis of variance ( $p < 0.05$ ). 2D data from Anderson et al. 2015 (16).

486

487 **Figure 3. Modeling confirms AI-2 chemotaxis and production influence the**  
488 **behavior of the cells in the biofilm.** Each leaving and joining event from 0-24 h  
489 of the modeled biofilms was graphed by genotype. Stars indicate a significant  
490 difference, results determined using a one-way analysis of variance ( $p < 0.05$ ).  $n$   
491 = 30 biofilms

492

493 **Figure 4. Modeling confirms AI-2 chemotaxis and production influence**  
494 **biofilm organization.** A) Lacunarity analysis pipeline for the modeled biofilm  
495 images. Bottom 98  $\mu\text{m}$  removed from each 24 h biofilm across all genotypes (see  
496 Materials and Methods). The top-down view is used to be able to compare to the  
497 experimental images (4C). Using ImageJ, each image was thresholded and then  
498 run through FracLac to determine the lacunarity score. More details can be found  
499 in the Materials and Methods section. B) Example images of all four modeled  
500 genotypes from the top-down. C) Example images of experimental *H. pylori*  
501 biofilms grown on glass slides, from Anderson et al. 2015. D) Lacunarity scores  
502 graphed for modeled biofilms ( $n = 8-10$ ). E) Lacunarity scores graphed for each  
503 experimental biofilm for each genotype from Anderson et al. Stars in D and E

504 indicate a significant difference from wild type, results determined using a one-  
505 way analysis of variance ( $p < 0.05$ ). 4E data from Anderson et al. 2015 (16).

## 506 **References**

- 507 1. Gupta P, Sarkar S, Das B, Bhattacharjee S, Tribedi P. 2016. Biofilm,  
508 pathogenesis and prevention—a journey to break the wall: a review. Arch  
509 Microbiol 198:1–15.
- 510 2. Hall-Stoodley L, Costerton JW, Stoodley P. 2004. Bacterial biofilms: from the  
511 Natural environment to infectious diseases. Nat Rev Microbiol 2:95–108.
- 512 3. Melaugh G, Hutchison J, Kragh KN, Irie Y, Roberts A, Bjarnsholt T, Diggle  
513 SP, Gordon VD, Allen RJ. 2016. Shaping the Growth Behaviour of Biofilms  
514 Initiated from Bacterial Aggregates. PloS One 11:e0149683.
- 515 4. Stewart PS. 2012. Mini-review: convection around biofilms. Biofouling  
516 28:187–198.
- 517 5. Wilking JN, Zaburdaev V, De Volder M, Losick R, Brenner MP, Weitz DA.  
518 2013. Liquid transport facilitated by channels in *Bacillus subtilis* biofilms.  
519 Proc Natl Acad Sci U S A 110:848–852.
- 520 6. Aparna MS, Yadav S. 2008. Biofilms: microbes and disease. Braz J Infect  
521 Dis Off Publ Braz Soc Infect Dis 12:526–530.
- 522 7. Nguyen T, Roddick FA, Fan L. 2012. Biofouling of Water Treatment  
523 Membranes: A Review of the Underlying Causes, Monitoring Techniques  
524 and Control Measures. Membranes 2:804–840.



- 525 8. Klausen M, Gjermansen M, Kreft J-U, Tolker-Nielsen T. 2006. Dynamics of  
526 development and dispersal in sessile microbial communities: examples from  
527 *Pseudomonas aeruginosa* and *Pseudomonas putida* model biofilms. FEMS  
528 Microbiol Lett 261:1–11.
- 529 9. Monds RD, O’Toole GA. 2009. The developmental model of microbial  
530 biofilms: ten years of a paradigm up for review. Trends Microbiol 17:73–87.
- 531 10. Ghanbari A, Dehghany J, Schwebs T, Müsken M, Häussler S, Meyer-  
532 Hermann M. 2016. Inoculation density and nutrient level determine the  
533 formation of mushroom-shaped structures in *Pseudomonas aeruginosa*  
534 biofilms. Sci Rep 6:32097.
- 535 11. Nadell CD, Drescher K, Foster KR. 2016. Spatial structure, cooperation and  
536 competition in biofilms. Nat Rev Microbiol 14:589–600.
- 537 12. Pérez-Velázquez J, Gölgeli M, García-Contreras R. 2016. Mathematical  
538 Modelling of Bacterial Quorum Sensing: A Review. Bull Math Biol 78:1585–  
539 1639.
- 540 13. Papenfort K, Bassler BL. 2016. Quorum sensing signal-response systems in  
541 Gram-negative bacteria. Nat Rev Microbiol 14:576–588.
- 542 14. Vendeville A, Winzer K, Heurlier K, Tang CM, Hardie KR. 2005. Making  
543 “sense” of metabolism: autoinducer-2, LuxS and pathogenic bacteria. Nat  
544 Rev Microbiol 3:383–396.

- 545 15. Ali SA, Benitez JA. 2009. Differential response of *Vibrio cholerae* planktonic  
546 and biofilm cells to autoinducer 2 deficiency. *Microbiol Immunol* 53:582–586.
- 547 16. Anderson JK, Huang JY, Wreden C, Sweeney EG, Goers J, Remington SJ,  
548 Guillemin K. 2015. Chemorepulsion from the Quorum Signal Autoinducer-2  
549 Promotes *Helicobacter pylori* Biofilm Dispersal. *mBio* 6:e00379-15.
- 550 17. Auger S, Krin E, Aymerich S, Gohar M. 2006. Autoinducer 2 affects biofilm  
551 formation by *Bacillus cereus*. *Appl Environ Microbiol* 72:937–941.
- 552 18. Li H, Li X, Wang Z, Fu Y, Ai Q, Dong Y, Yu J. 2015. Autoinducer-2 regulates  
553 *Pseudomonas aeruginosa* PAO1 biofilm formation and virulence production  
554 in a dose-dependent manner. *BMC Microbiol* 15:192.
- 555 19. Li J, Attila C, Wang L, Wood TK, Valdes JJ, Bentley WE. 2007. Quorum  
556 sensing in *Escherichia coli* is signaled by AI-2/LsrR: effects on small RNA  
557 and biofilm architecture. *J Bacteriol* 189:6011–6020.
- 558 20. Niu C, Robbins CM, Pittman KJ, Osborn joDi L, Stubblefield BA, Simmons  
559 RB, Gilbert ES. 2013. LuxS influences *Escherichia coli* biofilm formation  
560 through autoinducer-2-dependent and autoinducer-2-independent  
561 modalities. *FEMS Microbiol Ecol* 83:778–791.
- 562 21. Novak EA, Shao H, Daep CA, Demuth DR. 2010. Autoinducer-2 and QseC  
563 control biofilm formation and in vivo virulence of *Aggregatibacter*  
564 *actinomycetemcomitans*. *Infect Immun* 78:2919–2926.

- 565 22. Wang Z, Xiang Q, Yang T, Li L, Yang J, Li H, He Y, Zhang Y, Lu Q, Yu J.  
566 2016. Autoinducer-2 of *Streptococcus mitis* as a Target Molecule to Inhibit  
567 Pathogenic Multi-Species Biofilm Formation In Vitro and in an Endotracheal  
568 Intubation Rat Model. *Front Microbiol* 7:88.
- 569 23. Rader BA, Campagna SR, Semmelhack MF, Bassler BL, Guillemin K. 2007.  
570 The Quorum-Sensing Molecule Autoinducer 2 Regulates Motility and  
571 Flagellar Morphogenesis in *Helicobacter pylori*. *J Bacteriol* 189:6109–6117.
- 572 24. Laganenka L, Colin R, Sourjik V. 2016. Chemotaxis towards autoinducer 2  
573 mediates autoaggregation in *Escherichia coli*. *Nat Commun* 7:12984.
- 574 25. Hegde M, Englert DL, Schrock S, Cohn WB, Vogt C, Wood TK, Manson MD,  
575 Jayaraman A. 2011. Chemotaxis to the quorum-sensing signal AI-2 requires  
576 the Tsr chemoreceptor and the periplasmic LsrB AI-2-binding protein. *J*  
577 *Bacteriol* 193:768–773.
- 578 26. Jani S, Seely AL, Peabody V GL, Jayaraman A, Manson MD. 2017.  
579 Chemotaxis to self-generated AI-2 promotes biofilm formation in *Escherichia*  
580 *coli*. *Microbiology* 163:1778–1790.
- 581 27. Laganenka L, Sourjik V. 2018. Autoinducer 2-Dependent *Escherichia coli*  
582 Biofilm Formation Is Enhanced in a Dual-Species Coculture. *Appl Env*  
583 *Microbiol* 84:e02638-17.
- 584 28. Rader BA, Wreden C, Hicks KG, Sweeney EG, Ottemann KM, Guillemin K.  
585 2011. *Helicobacter pylori* perceives the quorum-sensing molecule AI-2 as a

- 586 chemorepellent via the chemoreceptor TlpB. *Microbiol Read Engl* 157:2445–  
587 2455.
- 588 29. Lardon LA, Merkey BV, Martins S, Dötsch A, Picioreanu C, Kreft J-U, Smets  
589 BF. 2011. iDynoMiCS: next-generation individual-based modelling of  
590 biofilms: iDynoMiCS for Biofilm Modelling. *Environ Microbiol* 13:2416–2434.
- 591 30. Vendeville A, Winzer K, Heurlier K, Tang CM, Hardie KR. 2005. Making  
592 “sense” of metabolism: autoinducer-2, LuxS and pathogenic bacteria. *Nat*  
593 *Rev Microbiol* 3:383–396.
- 594 31. Weiland-Bräuer N, Pinnow N, Schmitz RA. 2015. Novel reporter for  
595 identification of interference with acyl homoserine lactone and autoinducer-2  
596 quorum sensing. *Appl Environ Microbiol* 81:1477–1489.
- 597 32. Karperien A, Ahammer H, Jelinek HF. 2013. Quantitating the subtleties of  
598 microglial morphology with fractal analysis. *Front Cell Neurosci* 7:3.
- 599 33. Schneider CA, Rasband WS, Eliceiri KW. 2012. NIH Image to ImageJ: 25  
600 years of image analysis. *Nat Methods* 9:671–675.
- 601 34. Tolle C, McJunkin T, Rohrbaugh D, LaViolette R. 2003. Lacunarity definition  
602 for ramified data sets based on optimal cover. *Phys D Non-linear Phenom*  
603 179:129–152.

- 604 35. Mitra A, Herren CD, Patel IR, Coleman A, Mukhopadhyay S. 2016.  
605 Integration of AI-2 Based Cell-Cell Signaling with Metabolic Cues in  
606 *Escherichia coli*. *PloS One* 11:e0157532.
- 607 36. Xavier KB, Bassler BL. 2005. Regulation of uptake and processing of the  
608 quorum-sensing autoinducer AI-2 in *Escherichia coli*. *J Bacteriol* 187:238–  
609 248.
- 610 37. Surette MG, Miller MB, Bassler BL. 1999. Quorum sensing in *Escherichia*  
611 *coli*, *Salmonella typhimurium*, and *Vibrio harveyi*: A new family of genes  
612 responsible for autoinducer production. *Proc Natl Acad Sci U S A* 96:1639–  
613 1644.
- 614 38. Hardie KR, Heurlier K. 2008. Establishing bacterial communities by “word of  
615 mouth”: LuxS and autoinducer 2 in biofilm development. *Nat Rev Microbiol*  
616 6:635–643.
- 617 39. Quan DN, Tsao C-Y, Wu H-C, Bentley WE. 2016. Quorum Sensing  
618 Desynchronization Leads to Bimodality and Patterned Behaviors. *PLoS*  
619 *Comput Biol* 12:e1004781.
- 620 40. Ismail AS, Valastyan JS, Bassler BL. 2016. A Host-Produced Autoinducer-2  
621 Mimic Activates Bacterial Quorum Sensing. *Cell Host Microbe* 19:470–480.
- 622 41. Mark Welch JL, Rossetti BJ, Rieken CW, Dewhirst FE, Borisy GG. 2016.  
623 Biogeography of a human oral microbiome at the micron scale. *Proc Natl*  
624 *Acad Sci U S A* 113:E791-800.

- 625 42. Cuadra-Saenz G, Rao DL, Underwood AJ, Belapure SA, Campagna SR,  
626 Sun Z, Tammariello S, Rickard AH. 2012. Autoinducer-2 influences  
627 interactions amongst pioneer colonizing streptococci in oral biofilms.  
628 *Microbiology* 158:1783–1795.
- 629 43. Kolenbrander PE, Jr RJP, Periasamy S, Jakubovics NS. 2010. Oral  
630 multispecies biofilm development and the key role of cell–cell distance. *Nat*  
631 *Rev Microbiol* 8:471–480.

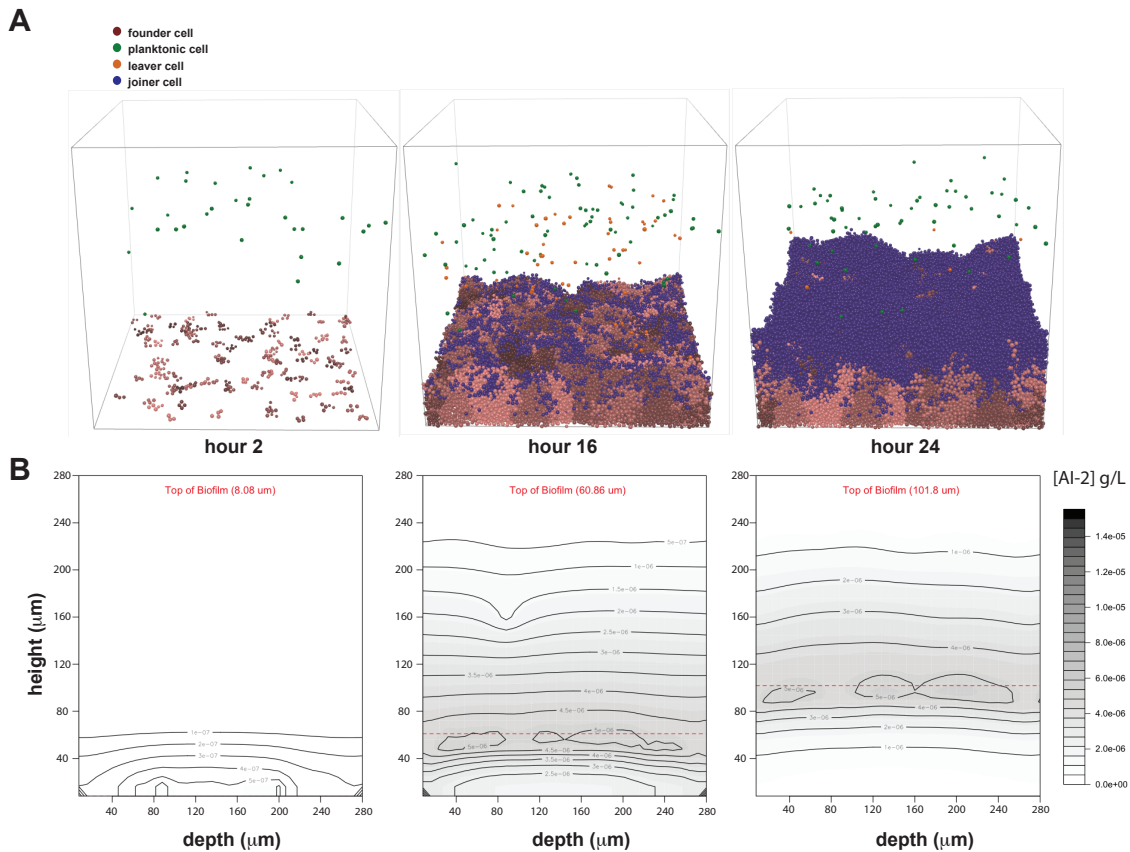

**Figure 1. Time steps and AI-2 gradients of example wild type iDynoMiCS modeled *H. pylori* biofilm.** A) Wild type biofilm after 2, 16 and 24 h of growth. Each sphere represents a modeled bacterial cell with colors corresponding to different cell behaviors (see legend). Note there is a mix of cells leaving, dividing from the original founding population and cells joining the biofilm. Each grouping of pink cells represents a clonal population. B) Shown are corresponding AI-2 concentration graphics below each time point shown in A. The AI-2 concentration is a representative vertical slice through the center of the 3D modeled biofilm, with darker color representing higher concentrations of AI-2.

632

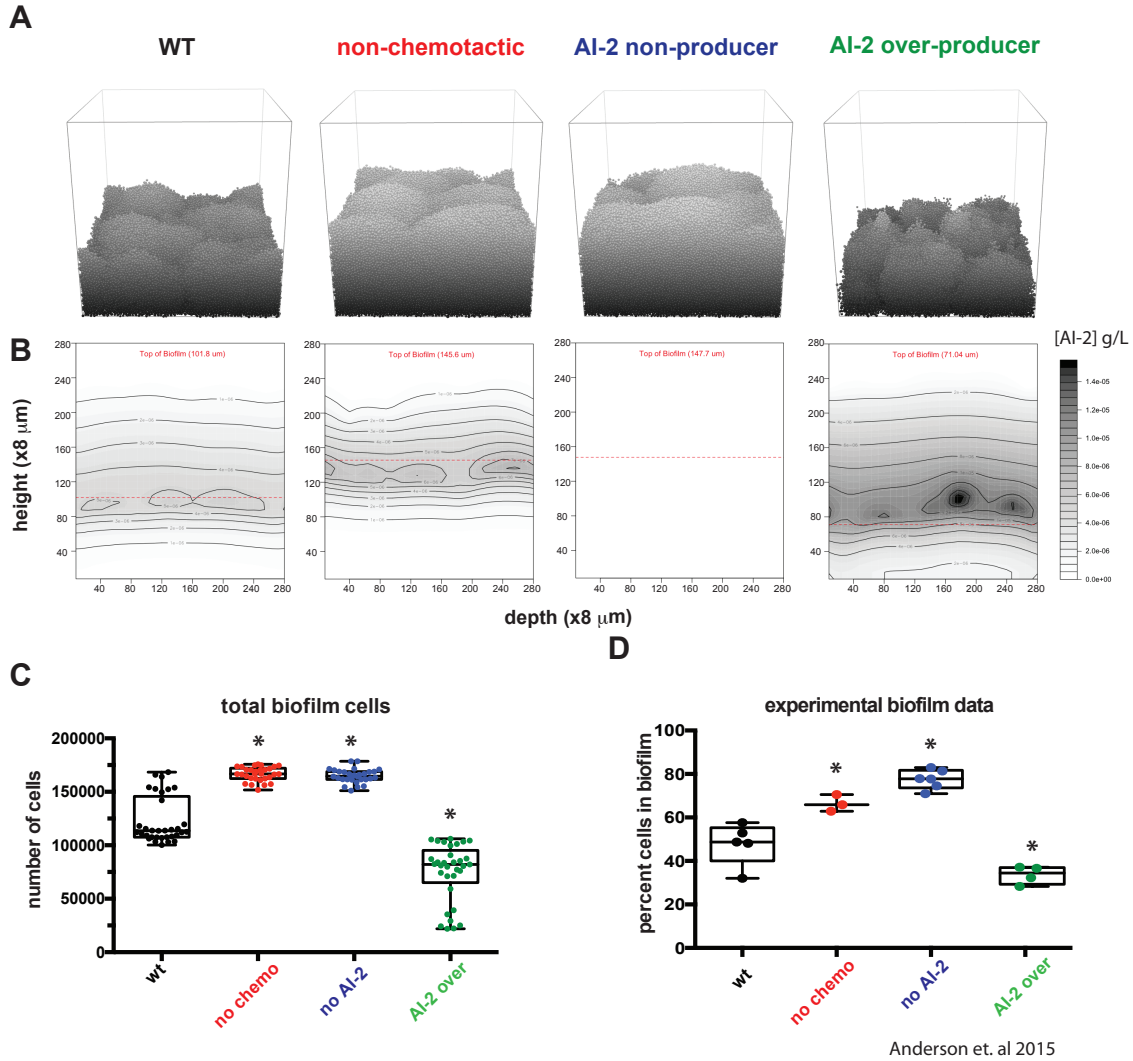

**Figure 2. Modeling confirms AI-2 chemotaxis and production alter overall biofilm size.** A) Representative images of 24 h biofilms for each of the four strains in grayscale to show contours. To simplify, only the founding population, their progeny and joiners are shown. Planktonic cells have been removed for simplicity. B) The associated AI-2 gradients for panels in A. C) Total number of cells attached to the modeled biofilms at timepoint 24 h.  $n = 30$  D) The size of the experimental biofilms from Anderson et al. are graphed according to percentage of cells in the biofilm (compared to planktonic). Stars indicate a significant difference from wild type. Statistics for C and D were determined using a one-way analysis of variance ( $p < 0.05$ ). 2D data from Anderson et al. 2015 (16).

633

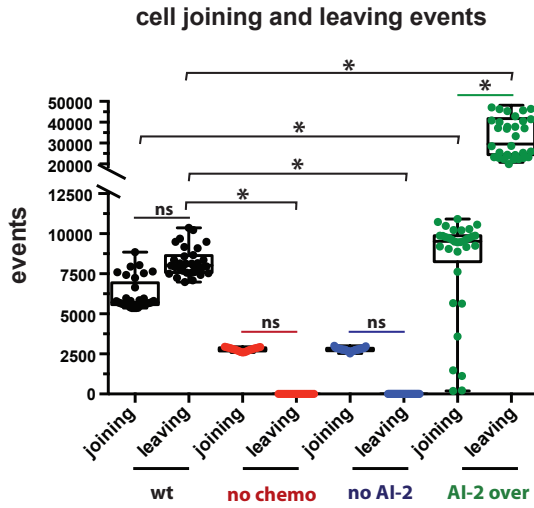

**Figure 3. Modeling confirms AI-2 chemotaxis and production influence the behavior of the cells in the biofilm.** Each leaving and joining event from 0-24 h of the modeled biofilms was graphed by genotype. Stars indicate a significant difference, results determined using a one-way analysis of variance ( $p < 0.05$ ).  $n = 30$  biofilms

634



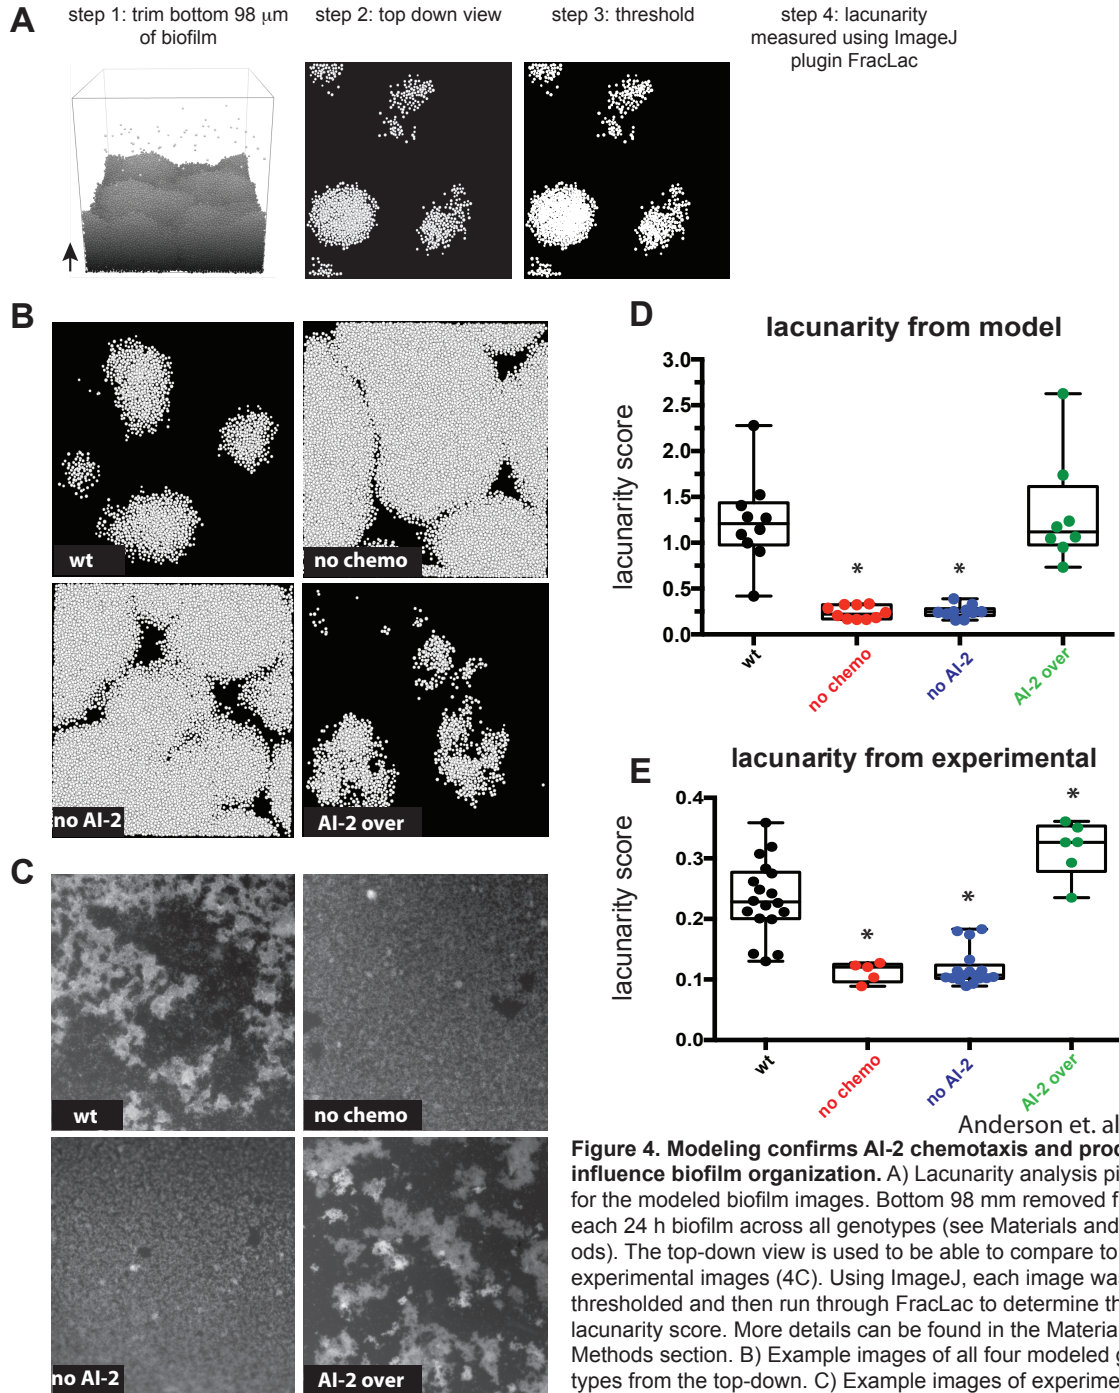

Anderson et. al 2015

Anderson et. al 2015

**Figure 4. Modeling confirms AI-2 chemotaxis and production influence biofilm organization.** A) Lacunarity analysis pipeline for the modeled biofilm images. Bottom 98  $\mu\text{m}$  removed from each 24 h biofilm across all genotypes (see Materials and Methods). The top-down view is used to be able to compare to the experimental images (4C). Using ImageJ, each image was thresholded and then run through FracLac to determine the lacunarity score. More details can be found in the Materials and Methods section. B) Example images of all four modeled genotypes from the top-down. C) Example images of experimental *H. pylori* biofilms grown on glass slides, from Anderson et al. 2015. D) Lacunarity scores graphed for modeled biofilms ( $n = 8-10$ ). E) Lacunarity scores graphed for each experimental biofilm for each genotype from Anderson et al. Stars in D and E indicate a significant difference from wild type, results determined using a one-way analysis of variance ( $p < 0.05$ ). 4E data from Anderson et al. 2015 (16).
